# Supplementary material for: Alkyl-triphenylamine end-capped triazines with AIE and large two-photon absorption cross-sections for bioimaging
Source: Royal Society of Chemistry journal article supplement (doi:10.1039/c4tc00910j), 2014-01-01
Supplement: c4tc00910j1.pdf [file c4tc00910j1.pdf]

## Electronic Supplementary Information

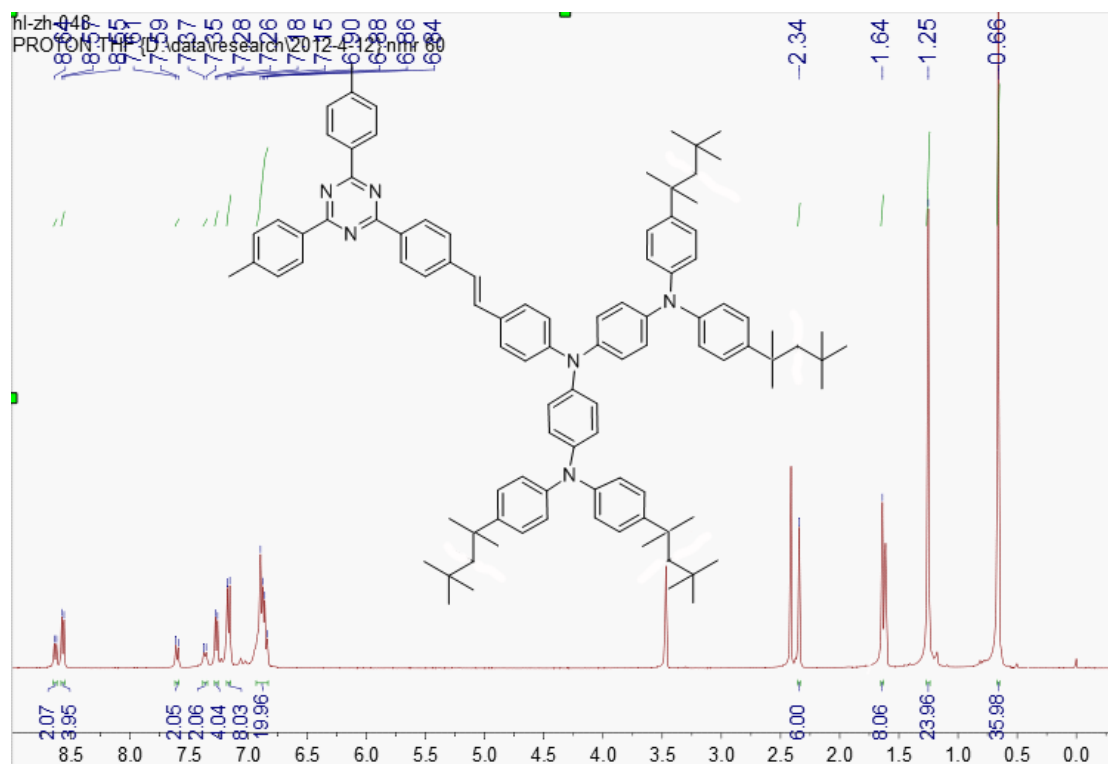

Figure S1. <sup>1</sup>H NMR spectra of ATT-1 in THF-*d*<sub>8</sub>

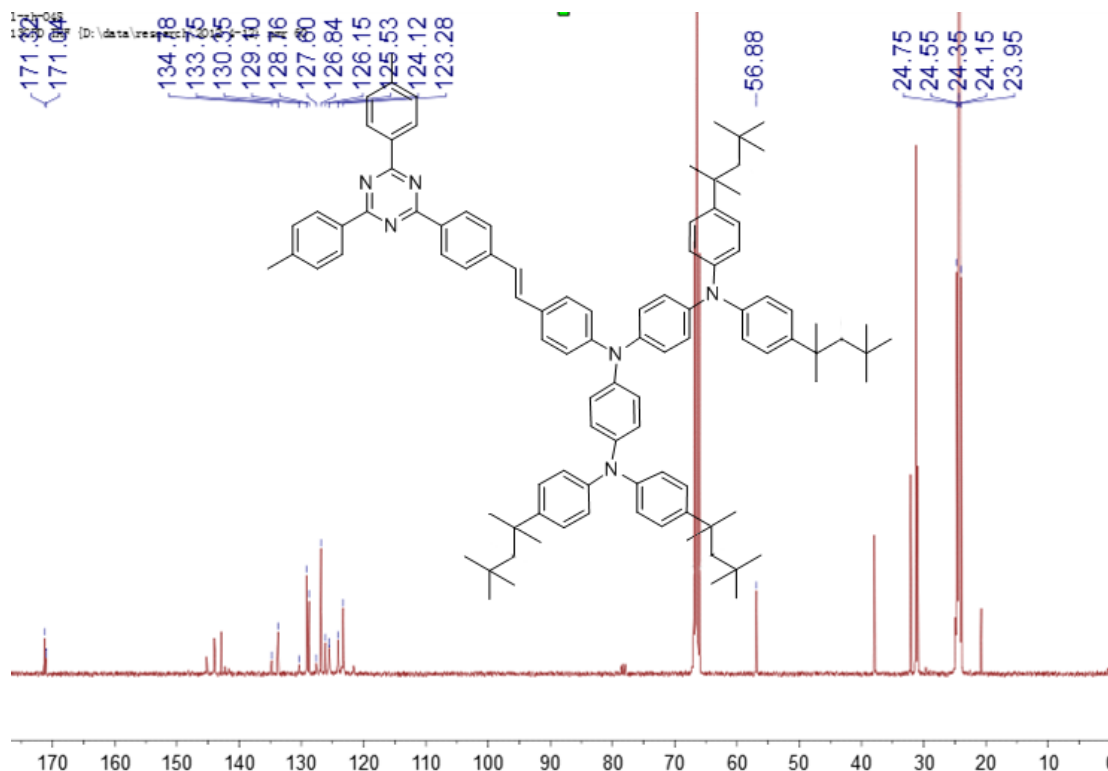

Figure S2. <sup>13</sup>C NMR spectra of ATT-1 in THF-*d*<sub>8</sub>

Monoisotopic Mass, Even Electron Ions

111 formula(e) evaluated with 4 results within limits (up to 1 closest results for each mass)

Elements Used:

C: 0-120 H: 0-120 N: 0-10

HUA-JL

ECUST Institute of Fine Chem

05-Dec-2011

18:32:48

1: TOF MS ES+

9.11e+003

HJL-ZH-006 71 (2.266) Cm (69.76)

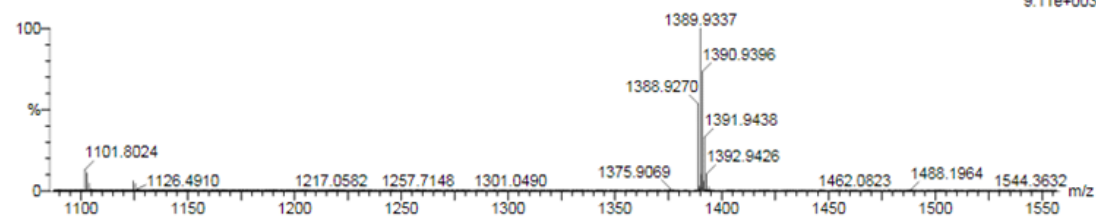

Minimum:

Maximum:

50.0 50.0 -1.5  
100.0

| Mass      | Calc. Mass | mDa  | PPM  | DBE  | i-FIT | i-FIT (Norm) | Formula     |
|-----------|------------|------|------|------|-------|--------------|-------------|
| 1389.9337 | 1389.9340  | -0.3 | -0.2 | 44.5 | 55.1  | 0.0          | C99 H117 N6 |

Figure S3. HR mass spectra of ATT-1

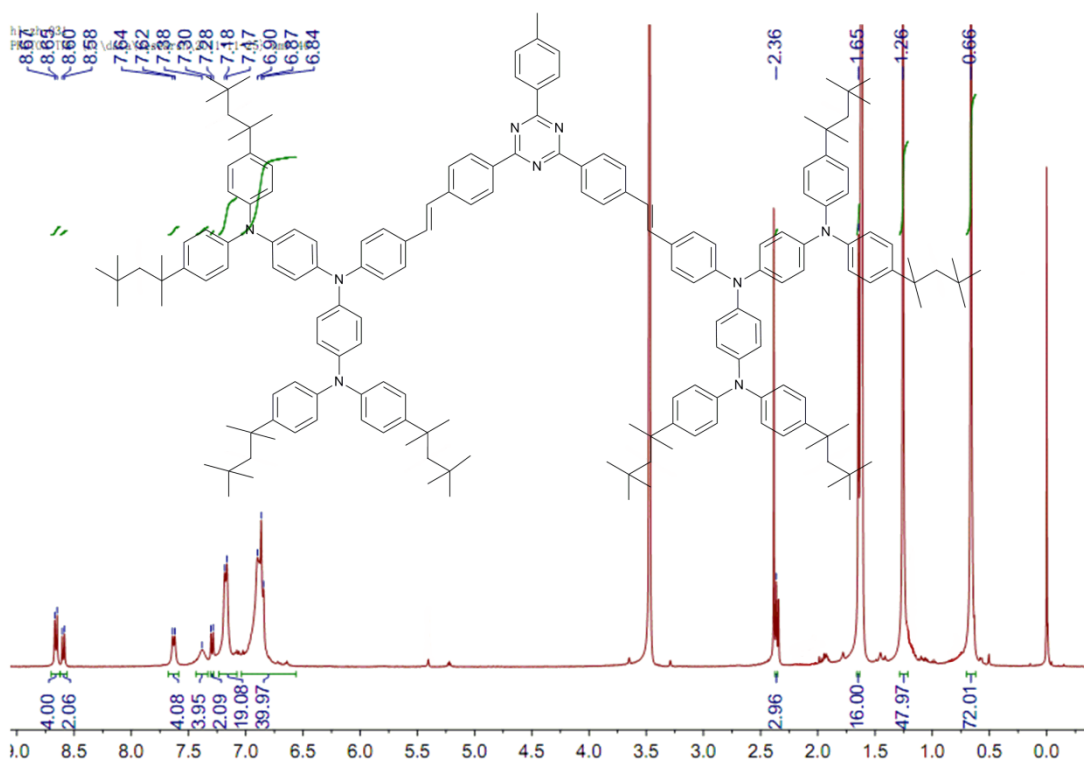

Figure S4.  $^1\text{H}$  NMR spectra of ATT-2 in  $\text{THF-}d_8$

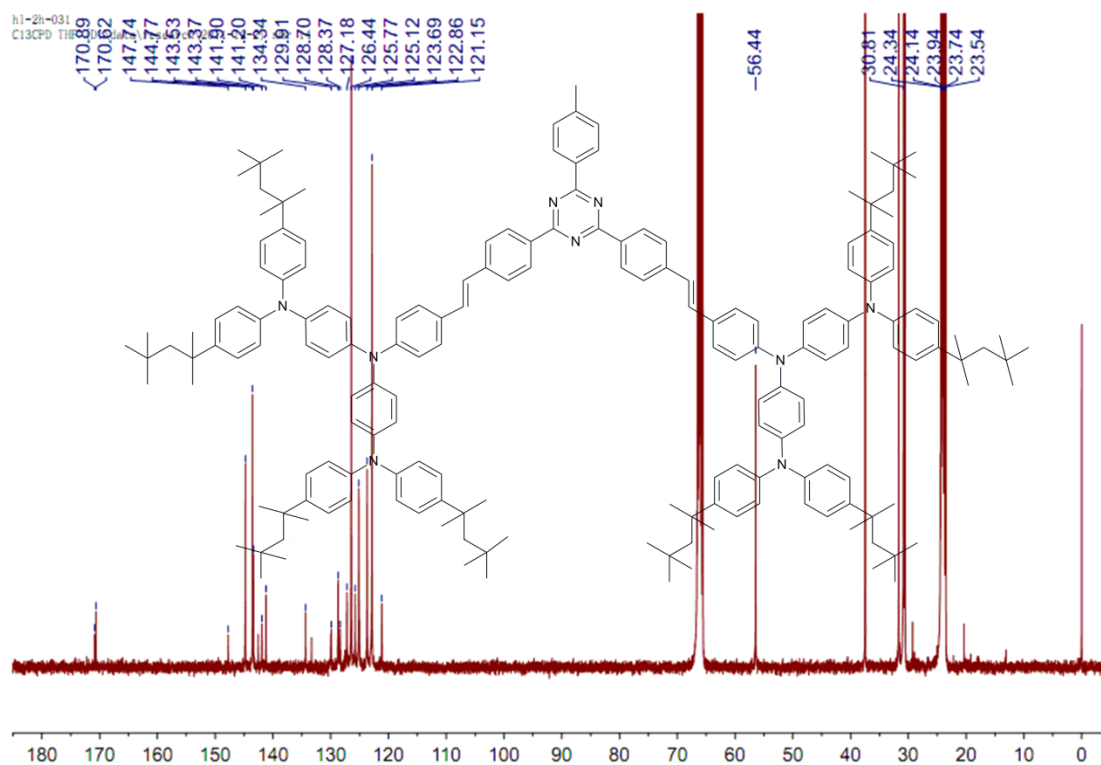

Figure S5.  $^{13}\text{C}$  NMR spectra of ATT-2 in  $\text{THF-}d_8$

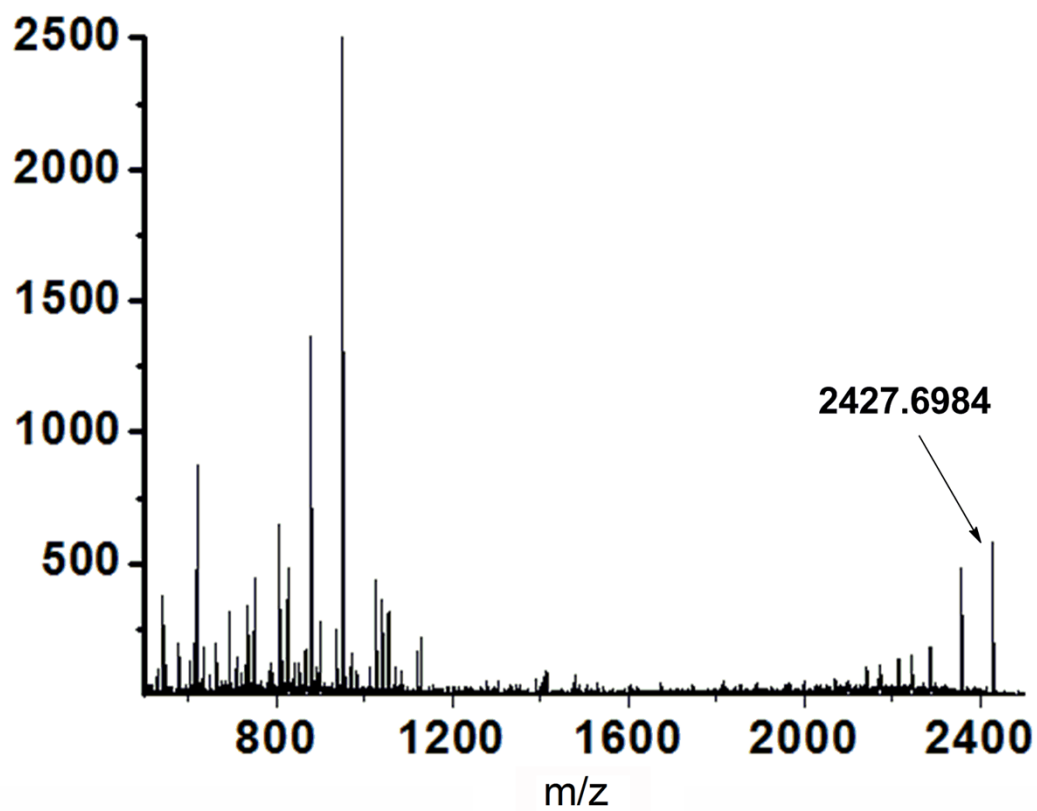

Figure S6. MALDI-TOF spectra of ATT-2

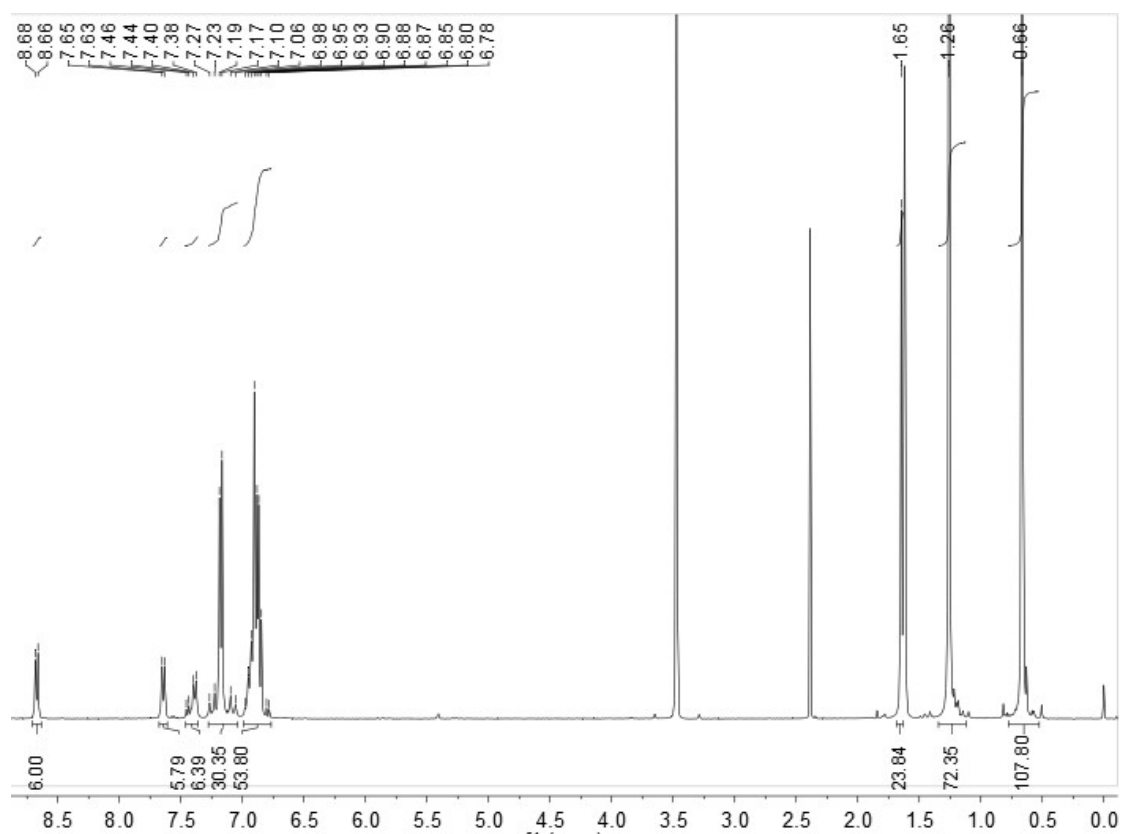

Figure S7. <sup>1</sup>H NMR spectra of ATT-3 in THF-*d*<sub>8</sub>

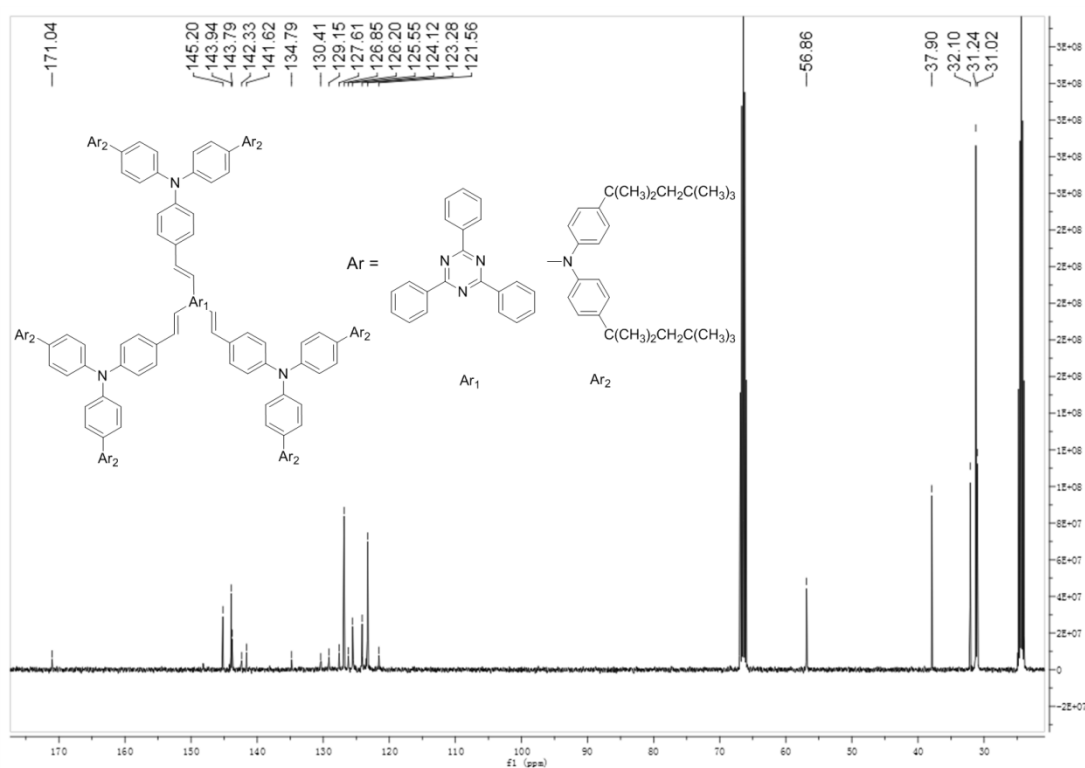

Figure S8. <sup>13</sup>C NMR spectra of ATT-3 in THF-*d*<sub>8</sub>

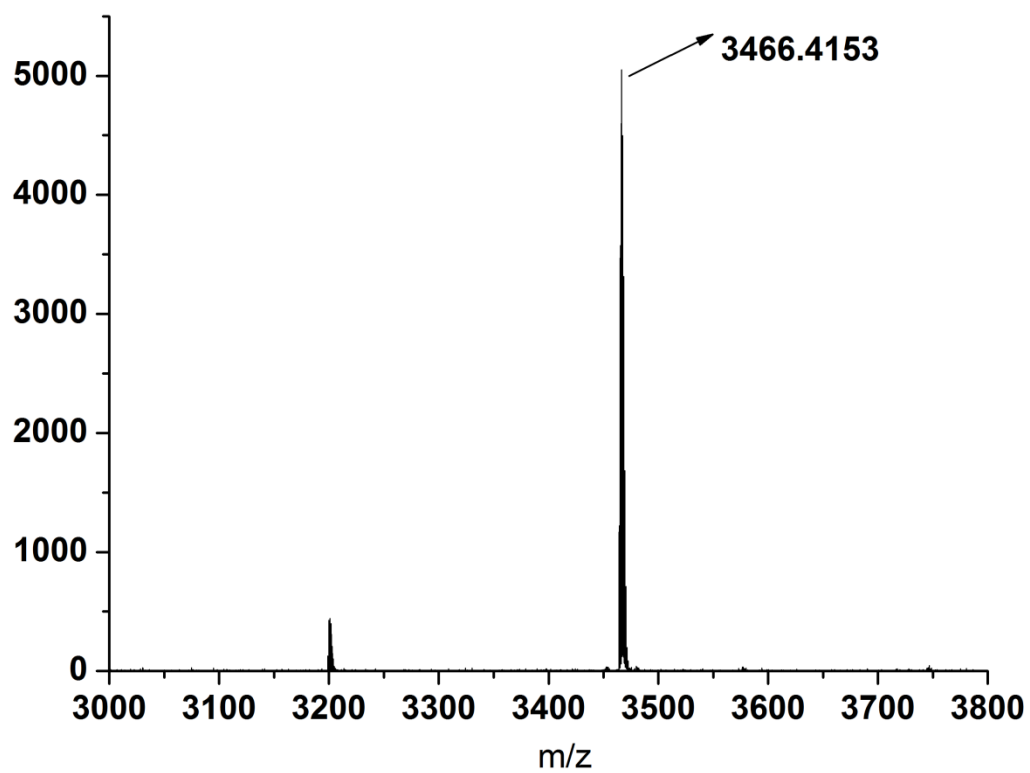

**Figure S9.** MALDI-TOF spectra of **ATT-3**
